# Supplementary material
Source: PubMed Central journal article supplement (PMC3039017)
Supplement: supp_124_5_718__1.pdf [file supp_124_5_718__1.pdf]

**Table S1. MS/MS data of RP2-interacting proteins.**

| Protein                              | Peptide sequence      | Calculated mass | Observed mass |
|--------------------------------------|-----------------------|-----------------|---------------|
| RP2                                  | SSDESCLVVLFAGDYTIANAR | 2288.0862       | 2288.0891     |
|                                      | DYMFSGLKDETVGR        | 1617.7577       | 1617.7513     |
|                                      | ESRPENEEERP           | 1499.7085       | 1499.70705    |
|                                      | CTLACQQFR             | 1183.5347       | 1183.5297     |
|                                      | QYSWDQR               | 982.4377        | 982.4384      |
| Tubulin $\beta$                      | YLTVAAVFR             | 1039.5935       | 1039.5867     |
|                                      | FPGQLNADLR            | 1130.5953       | 1130.5884     |
|                                      | ISEQFTAMFR            | 1229.5983       | 1229.5903     |
|                                      | GHYTEGAELVDSVLDVVR    | 1958.9817       | 1958.9678     |
| Importin $\beta$ 3/RanBP5            | FYFHDGVR              | 1040.4949       | 1040.4955     |
|                                      | ITFLLQAIR             | 1074.667        | 1074.6638     |
|                                      | ICDIAAELAR            | 1131.5826       | 1131.5837     |
|                                      | FLFDSVSSQNMGLR        | 1600.7788       | 1600.7734     |
|                                      | VAAAESMPLLECAR        | 1630.8291       | 1630.8188     |
|                                      | VIAALLQTMEDQGNQR      | 1786.9116       | 1786.9037     |
| Importin $\beta$ 2/<br>Transportin 1 | SECLNNIGDSSPLIR       | 1674.8115       | 1674.8022     |
|                                      | TLENTAITIGR           | 1301.7423       | 1301.7372     |
|                                      | NQVGDENWR             | 1117.5021       | 1117.5007     |
|                                      | FSDQFPLPK             | 1191.6409       | 1191.6344     |
|                                      | ESQSPDTTIQR           | 1261.6019       | 1261.5990     |
